# Supplementary material for: Qualifying the contribution of fiber diameter on the acrylate-based electrospun shape memory polymer nano/microfiber properties
Source: Royal Society of Chemistry journal article supplement (doi:10.1039/d2ra05019f), 2022-01-01
Supplement: d2ra05019f1.pdf [file d2ra05019f1.pdf]

## Supporting Information

### **Qualifying the Contribution of Fiber Size Fiber Diameter on the Acrylate-based Electrospun Shape Memory Polymer Nano/microfiber Properties**

Jiaxin Xi, Shima Shahab, Reza Mirzaeifar<sup>1</sup>

*Department of Mechanical Engineering, Virginia Tech, Blacksburg, Virginia 24061, USA*

---

<sup>1</sup> Corresponding Author, Email: [rmirzaei@vt.edu](mailto:rmirzaei@vt.edu), phone: +1-540-231-8697, fax: +1-540-231-2903, lab URL: <https://www.futurematerials-lab.com/>

**Table S1: Electrospinning Conditions**

| Polystyrene (PS)<br>concentration<br>(wt%) | tD : PS<br>(wt%) | Flow rate<br>( $\mu$ L/min) | Voltage<br>(kV) | Working<br>distance<br>(cm) |
|--------------------------------------------|------------------|-----------------------------|-----------------|-----------------------------|
| 25                                         | 1 : 1            | 1, 2.5, 5                   | 25              | 17                          |
| 30                                         | 1 : 1            | 1, 2.5, 5                   | 25              | 17                          |
| 35                                         | 1 : 1            | 1, 2.5, 5                   | 25              | 17                          |
| 40                                         | 1 : 1            | 0.75, 1, 2.5, 5,<br>7.5, 10 | 25              | 17                          |

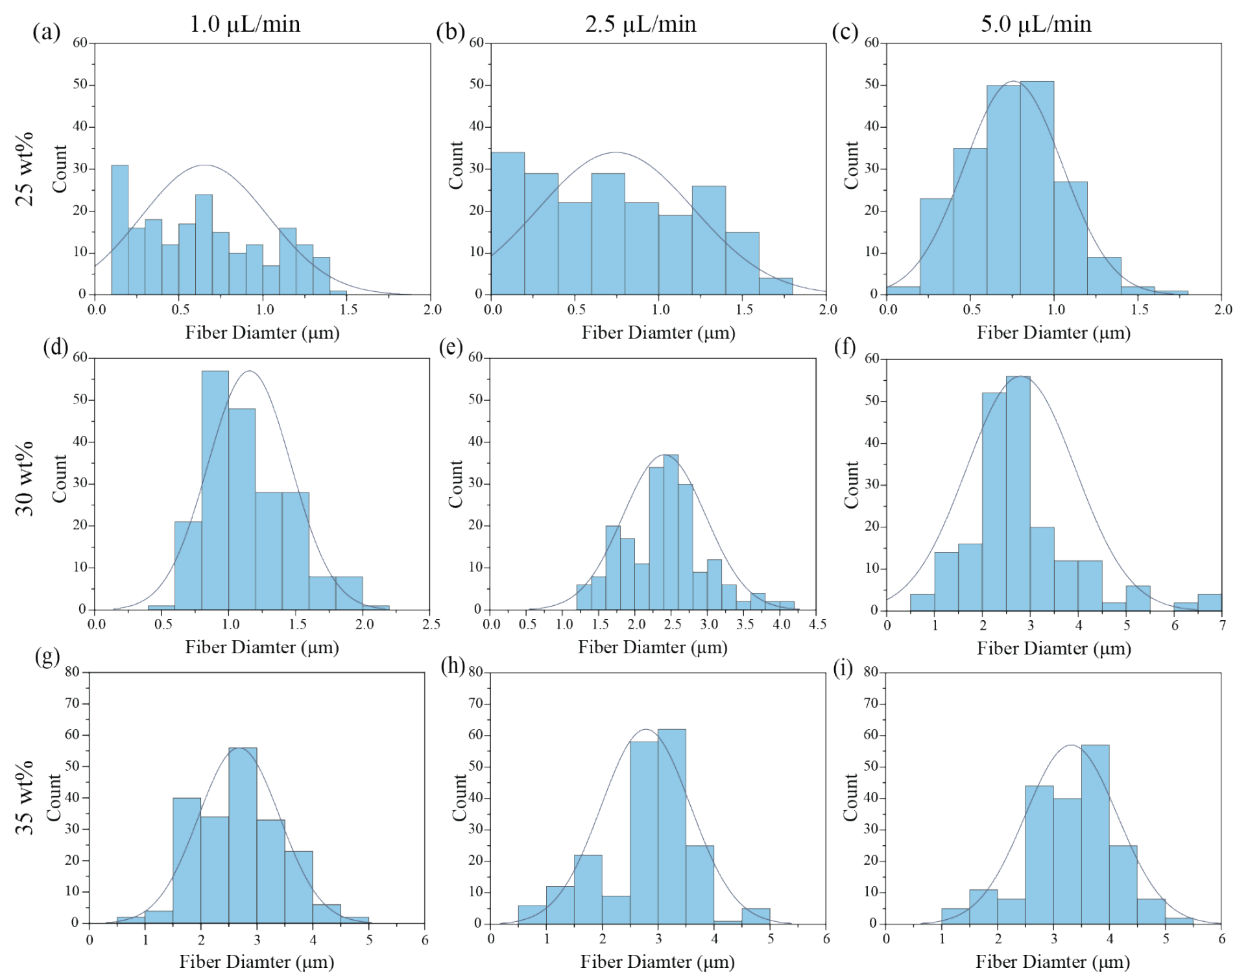

**Figure S1:** Histogram of fiber diameter distribution of electrospun nanofibers with different PE solution concentration of 25 wt% (a-c), 30 wt% (d-f) and 35 wt% (g-i) at various flow rates of 1.0  $\mu\text{L}/\text{min}$  (a, d, g), 2.5  $\mu\text{L}/\text{min}$  (b, e, h) and 5.0  $\mu\text{L}/\text{min}$  (c, f, i).

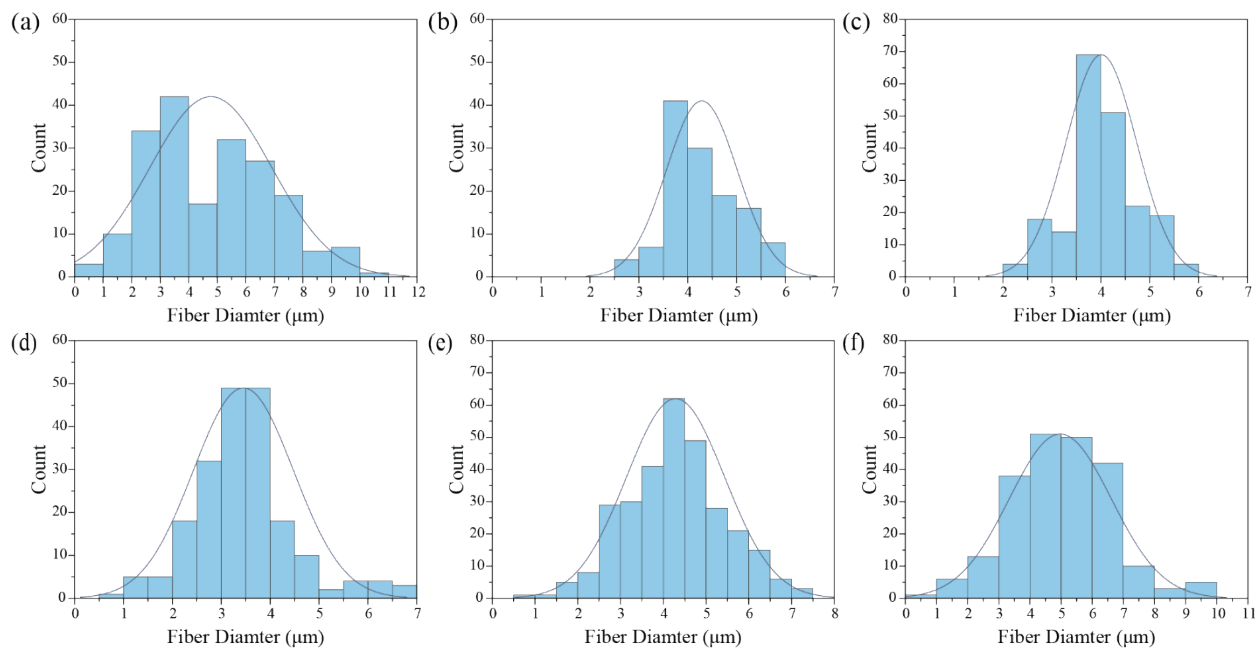

**Figure S2:** Histogram of fiber diameter distribution of electrospun nanofibers with 40 wt% PE solution at various flow rates; (a) 0.75 μL/min, (b) 1.0 μL/min, (c) 2.5 μL/min, (d) 5.0 μL/min, (e) 7.5 μL/min, and (f) 10.0 μL/min.

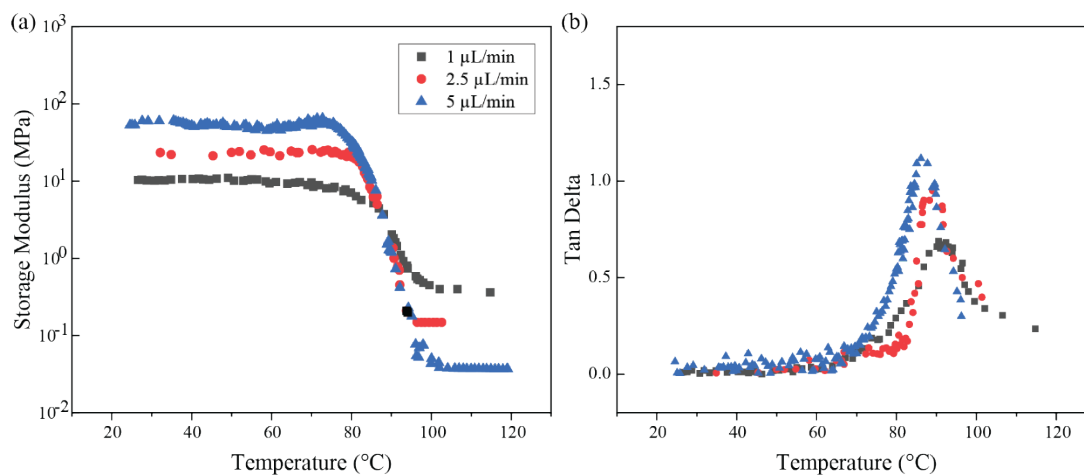

**Figure S3:** (a) Storage modulus and (b) tan delta obtained from DMA tests for electrospun fibers with 35 wt% PE solution at different flow rates.

Video 1. The shape memory effect of the tBA/PS (35%) sample at a flow rate 5.0  $\mu\text{L}/\text{min}$  during the heating process.
